# Supplementary material for: Lymphocyte crosstalk is required for monocyte-intrinsic trained immunity to Plasmodium falciparum
Source: PubMed Central journal article supplement (PMC9151696; doi:10.1172/jci139298), 2022-06-01
Supplement: jci-132-139298-s059.pdf [file jci-132-139298-s059.pdf]

## Key Resources Table

| REAGENT or RESOURCE                                  | SOURCE    | IDENTIFIER                    |
|------------------------------------------------------|-----------|-------------------------------|
| Antibodies                                           |           |                               |
| Anti-human CD3 (UCHT1) 170Er                         | Fluidigm  | 3170001B;<br>RRID: AB_2661807 |
| Anti-human CD4 (RPA-T4) 145Nd                        | Fluidigm  | 3145001B;<br>RRID: AB_2661789 |
| Anti-human CD8 (SK1) 168Er                           | Fluidigm  | 3168002B                      |
| Anti-Human CD45RA (HI100) 155Gd                      | Fluidigm  | 3155011B;<br>RRID: AB_2810246 |
| Anti-human CD19 (HIB19) 142Nd                        | Fluidigm  | 3142001B;<br>RRID: AB_2651155 |
| Anti-human HLA-DR (L243) 174Yb                       | Fluidigm  | 3174001B;<br>RRID: AB_2665397 |
| Anti-human CD14 (RMO52) 148Nd                        | Fluidigm  | 3148010B                      |
| anti-human CD16 (3G8) 209Bi                          | Fluidigm  | 3209002B;<br>RRID: AB_2756431 |
| anti-human CD11c (Bu15) 147Sm                        | Fluidigm  | 3147008B;<br>RRID: AB_2687850 |
| anti-human CD56 (NCAM16.2) 163Dy                     | Fluidigm  | 3163007B                      |
| anti-human CD123/IL-3R (6H6) 143Nd                   | Fluidigm  | 3143014B;<br>RRID: AB_2811081 |
| anti-human CD303/BDCA2 (201A) 153Eu                  | Fluidigm  | 3153007B                      |
| anti-human CD141 (1A4) 173Yb                         | Fluidigm  | 3173002B;<br>RRID: AB_2714156 |
| anti-human IL-10 (JES3-9D7) 166Er                    | Fluidigm  | 3166008B                      |
| anti-human IL-6 (MQ2-13AS) 156Gd                     | Fluidigm  | 3156011B;<br>RRID: AB_2810973 |
| anti-human IFN $\gamma$ (B27) 165Ho                  | Fluidigm  | 3165002B                      |
| anti-human TNF $\alpha$ (Mab11) 152Sm                | Fluidigm  | 3152002B                      |
| anti-human GM-CSF (BVD2-21C11) 159Tb                 | Fluidigm  | 3159008B                      |
| anti-human IL-2 (MQ1-17H12) 158Gd                    | Fluidigm  | 3158007B                      |
| anti-human CD38 (HIT2) 172Yb                         | Fluidigm  | 3172007B;<br>RRID: AB_2756288 |
| anti-human CD86/B7.2 (IT2.2) 150Nd                   | Fluidigm  | 3150020B;<br>RRID: AB_2687852 |
| anti-human CD274/PDL1 (29E.2A3) 175Lu                | Fluidigm  | 3175017B                      |
| Anti-APC (APC003) 176Yb                              | Fluidigm  | 3176007B;<br>RRID: AB_2811236 |
| APC anti-human CD1c antibody (L161)                  | BioLegend | 331524;<br>RRID: AB_10718511  |
| Human TruStain FcX (Fc Receptor Blocking Solution)   | BioLegend | 422302                        |
| APC/Cyanine7 anti-human CD1c (L161)                  | BioLegend | 331519;<br>RRID: AB_10643413  |
| Brilliant Violet 510 anti-human CD4 (OKT4)           | BioLegend | 317443;<br>RRID: AB_2561377   |
| Brilliant Violet 605 anti-human CD56 (NCAM) (5.1H11) | BioLegend | 362537;<br>RRID: AB_2565855   |
| Brilliant Violet 650 anti-human CD8a (RPA-T8)        | BioLegend | 301042;<br>RRID: AB_2563505   |
| Brilliant Violet 785 anti-human CD123 (6H6)          | BioLegend | 306031;<br>RRID: AB_2566448   |

|                                                              |                        |                                   |
|--------------------------------------------------------------|------------------------|-----------------------------------|
| Pacific Blue anti-human CD19 (SJ25C1)                        | BioLegend              | 363035;<br>RRID: AB_2632787       |
| PE/Cy7 anti-human CD68 (Y1/82A)                              | BioLegend              | 333815;<br>RRID: AB_2562935       |
| PerCP/Cy5.5 anti-human CD141 (Thrombomodulin) (M80)          | BioLegend              | 344111;<br>RRID: AB_2561624       |
| Anti-human CD16 PerCP-eF710                                  | eBioscience            | 46-0168-42                        |
| APC anti-human CD14 (61D3)                                   | Tonbo Biosciences      | 20-0149T100;<br>RRID: AB_2621560  |
| FITC anti-human CD11c (3.9)                                  | Tonbo Biosciences      | 35-0116-T100;<br>RRID: AB_2621678 |
| redFluor 710 anti-human HLA-DR (L243)                        | Tonbo Biosciences      | 80-9952-T100;<br>RRID: AB_2622001 |
| PE anti-human CD3 (Hit3a)                                    | Tonbo Biosciences      | 50-0039-T100;<br>RRID: AB_2621735 |
| BV750 Mouse anti-human TNF (MAb11)                           | BD Biosciences         | 566359;<br>RRID: AB_2739709       |
| BV421 rat anti-human IL-6 (MQ2-13A5)                         | BD Biosciences         | 563279;<br>RRID: AB_2738113       |
|                                                              |                        |                                   |
| <b>Biological Samples</b>                                    |                        |                                   |
| Human male AB serum                                          | Sigma                  | H4522-100ML                       |
| Fetal Bovine Serum                                           | Atlanta Biologicals    | S11150                            |
| Human PBMC from healthy donors                               | This Study             |                                   |
| Human erythrocytes from healthy donors                       | This Study             |                                   |
|                                                              |                        |                                   |
| <b>Chemicals, Peptides, and Recombinant Proteins</b>         |                        |                                   |
| Human IFN gamma                                              | Peprotech              | 300-02                            |
| Hemozoin purified from <i>P.f.</i> 3D7                       | This paper             |                                   |
| Tofacitinib (CP-690550, Tasocitinib)                         | Selleck Chemicals      | S2789                             |
| PBS, 1X without calcium and magnesium                        | Corning                | 21-040-CV                         |
| RPMI Medium 1640 powder (+)L-Glutamine (-)Sodium Bicarbonate | Gibco                  | 31800-022                         |
| RPMI 1640, 1X with L-glutamine                               | Corning                | 10-040-CV                         |
| L-Glutamine, USP                                             | Gibco                  | 21051-024                         |
| HEPES                                                        | Fisher                 | BP310-100                         |
| Sodium bicarbonate (7.5%)                                    | Gibco                  | 25080-094                         |
| Sodium Pyruvate                                              | Sigma                  | P5280-25G                         |
| Gentamicin Reagent Solution                                  | Gibco                  | 15750-060                         |
| Red Blood Cell Lysis Buffer                                  | Roche                  | 11814389001                       |
| Giemsa Stain, Modified Solution                              | Sigma                  | 48900-500ML-F                     |
| Albumax II                                                   | Gibco                  | 11021-037                         |
| Ultrapure E. coli 0111:B4 LPS                                | Invivogen              | tlrl-3pelps                       |
| Pam3CSK4                                                     | Invivogen              | tlrl-pms                          |
| DMSO Hybri-Max                                               | Sigma                  | D2650                             |
| Affymetrix 4% Paraformaldehyde                               | ThermoFisher           | J19943-K2                         |
| eBioscience Brefeldin A                                      | Invitrogen             | 00-4506-51                        |
| EDTA                                                         | Boston BioProducts     | BM-150                            |
| Cell Culture Grade Water                                     | Corning                | 25-055-CM                         |
| Heparin Sodium Injection, USP                                | Sagent Pharmaceuticals | NDC 25021-400-10                  |

|                                                        |                                               |                                                                                                                                                 |
|--------------------------------------------------------|-----------------------------------------------|-------------------------------------------------------------------------------------------------------------------------------------------------|
| Hypoxanthine                                           | Sigma                                         | H9377-25G                                                                                                                                       |
| <b>Critical Commercial Assays</b>                      |                                               |                                                                                                                                                 |
| Human IFN-gamma DuoSet ELISA                           | R&D Systems                                   | DY285B-05                                                                                                                                       |
| Human CXCL10/IP-10 DuoSet ELISA                        | R&D Systems                                   | DY266-05                                                                                                                                        |
| Human IL-6 DuoSet ELISA                                | R&D Systems                                   | DY206                                                                                                                                           |
| Human TNF-alpha DuoSet ELISA                           | R&D Systems                                   | DY210                                                                                                                                           |
| CD4+ T cell isolation kit, human                       | Miltenyi Biotec                               | 130-096-533                                                                                                                                     |
| Pan Monocyte isolation kit, human                      | Miltenyi Biotec                               | 130-096-537                                                                                                                                     |
| CD3 MicroBeads, human                                  | Miltenyi Biotec                               | 130-050-101                                                                                                                                     |
| CD14 MicroBeads, human                                 | Miltenyi Biotec                               | 130-050-201                                                                                                                                     |
| CD56 MicroBeads, human                                 | Miltenyi Biotec                               | 130-050-401                                                                                                                                     |
| Aurum Total RNA Mini Kit                               | Bio-Rad                                       | 732-6820                                                                                                                                        |
| TruSeq Stranded Total RNA library Prep Human/Mouse/Rat | Illumina                                      | 20020596                                                                                                                                        |
| TruSeq Single Indexes Set A                            | Illumina                                      | 20020492                                                                                                                                        |
| QuantiChrom Heme Assay kit                             | BioAssay Systems                              | DIHM-250                                                                                                                                        |
| <b>Deposited Data</b>                                  |                                               |                                                                                                                                                 |
|                                                        |                                               |                                                                                                                                                 |
|                                                        |                                               |                                                                                                                                                 |
|                                                        |                                               |                                                                                                                                                 |
|                                                        |                                               |                                                                                                                                                 |
| <b>Experimental Models: Organisms/Strains</b>          |                                               |                                                                                                                                                 |
| <i>Plasmodium falciparum</i> strain 3D7                | BEI Resources, MR4                            | MRA-102                                                                                                                                         |
|                                                        |                                               |                                                                                                                                                 |
|                                                        |                                               |                                                                                                                                                 |
|                                                        |                                               |                                                                                                                                                 |
| <b>Software and Algorithms</b>                         |                                               |                                                                                                                                                 |
| Flowjo version 10                                      | Becton, Dickinson and Co.                     | <a href="https://www.flowjo.com/">https://www.flowjo.com/</a><br>RRID: SCR_008520                                                               |
| Prism version 8                                        | GraphPad                                      | <a href="https://www.graphpad.com/scientific-software/prism/">https://www.graphpad.com/scientific-software/prism/</a><br>RRID: SCR_002798       |
| Illustrator, 23.1.1                                    | Adobe                                         | <a href="https://www.adobe.com/products/illustrator.html">https://www.adobe.com/products/illustrator.html</a><br>RRID: SCR_010279               |
| Bowtie2                                                | Langmead and Salzberg, 2012<br>PMID: 22388286 | <a href="http://bowtie-bio.sourceforge.net/bowtie2/index.shtml">http://bowtie-bio.sourceforge.net/bowtie2/index.shtml</a>                       |
| RSEM                                                   | Li and Dewey, 2011<br>PMID: 21816040          | <a href="https://deweylab.github.io/RSEM/">https://deweylab.github.io/RSEM/</a><br>RRID: SCR_013027                                             |
| EBSeq-HMM                                              | Leng et al. 2015<br>PMID: 25847007            | <a href="http://bioconductor.org/packages/release/bioc/html/EBSeqHMM.html">http://bioconductor.org/packages/release/bioc/html/EBSeqHMM.html</a> |

|                    |                                              |                                                                                                 |
|--------------------|----------------------------------------------|-------------------------------------------------------------------------------------------------|
| Gene Ontology (GO) | Falcon and Gentleman, 2007<br>PMID: 17098774 | <a href="http://geneontology.org/">http://geneontology.org/</a><br>RRID: SCR_002811             |
| R                  | R Core Team, 2018                            | <a href="https://www.r-project.org/">https://www.r-project.org/</a><br>RRID: SCR_001905         |
| ggplot2            | H. Wickham, 2009<br>ISBN: 978-0-387-98141-3  | <a href="https://ggplot2.tidyverse.org/">https://ggplot2.tidyverse.org/</a><br>RRID: SCR_014601 |
| Other              |                                              |                                                                                                 |

|                                   |                 |             |
|-----------------------------------|-----------------|-------------|
| Maxpar Cell staining Buffer       | Fluidigm        | 201068      |
| Maxpar Fix and Perm Buffer        | Fluidigm        | 201067      |
| EQ Four Element Calibration beads | Fluidigm        | 201078      |
| Cell-ID Cisplatin                 | Fluidigm        | 201064      |
| Cell-ID Intercalator-Ir 125 uM    | Fluidigm        | 201192A     |
| Maxpar Perm-S Buffer              | Fluidigm        | 201066      |
| LS columns                        | Miltenyi Biotec | 130-042-401 |
| LD columns                        | Miltenyi Biotec | 130-042-901 |
| Ficoll Paque-PLUS                 | GE Healthcare   | 17144002    |
| QuadroMACS Separator              | Miltenyi Biotec | 130-090-976 |
| BD Cytotfix/Cytoperm              | BD Biosciences  | 554714      |
| Zombie Green Dye                  | BioLegend       | 77476       |
| OneComp eBeads                    | Invitrogen      | 2020-06-30  |
|                                   |                 |             |
|                                   |                 |             |
|                                   |                 |             |

### PCR Primers with Illumina adapters

|                 |                                                       |
|-----------------|-------------------------------------------------------|
| Ad1_noMX        | AATGATACGGCGACCACCGAGATCTACACTCGTCGGCAGCGTCAGATGTG    |
| Ad2.1_TAAGGCGA  | CAAGCAGAAGACGGCATACGAGATTCGCCTTAGTCTCGTGGGCTCGGAGATGT |
| Ad2.2_CGTACTAG  | CAAGCAGAAGACGGCATACGAGATCTAGTACGGTCTCGTGGGCTCGGAGATGT |
| Ad2.3_AGGCAGAA  | CAAGCAGAAGACGGCATACGAGATTTCTGCCTGTCTCGTGGGCTCGGAGATGT |
| Ad2.7_CTCTCTAC  | CAAGCAGAAGACGGCATACGAGATGTAGAGAGGTCTCGTGGGCTCGGAGATGT |
| Ad2.8_CAGAGAGG  | CAAGCAGAAGACGGCATACGAGATCCTCTCTGGTCTCGTGGGCTCGGAGATGT |
| Ad2.9_GCTACGCT  | CAAGCAGAAGACGGCATACGAGATAGCGTAGCGTCTCGTGGGCTCGGAGATGT |
| Ad2.11_AAGAGGCA | CAAGCAGAAGACGGCATACGAGATTGCCTCTTGTCTCGTGGGCTCGGAGATGT |
| Ad2.16_CCGTTTGT | CAAGCAGAAGACGGCATACGAGATACAAACGGGTCTCGTGGGCTCGGAGATGT |
| Ad2.17_TGCTGGGT | CAAGCAGAAGACGGCATACGAGATACCCAGCAGTCTCGTGGGCTCGGAGATGT |
| Ad2.18_GAGGGGTT | CAAGCAGAAGACGGCATACGAGATAACCCCTCGTCTCGTGGGCTCGGAGATGT |
| Ad2.22_TGGTCACA | CAAGCAGAAGACGGCATACGAGATTGTGACCAGTCTCGTGGGCTCGGAGATGT |
| Ad2.24_CCACTCCT | CAAGCAGAAGACGGCATACGAGATAGGAGTGGGTCTCGTGGGCTCGGAGATGT |

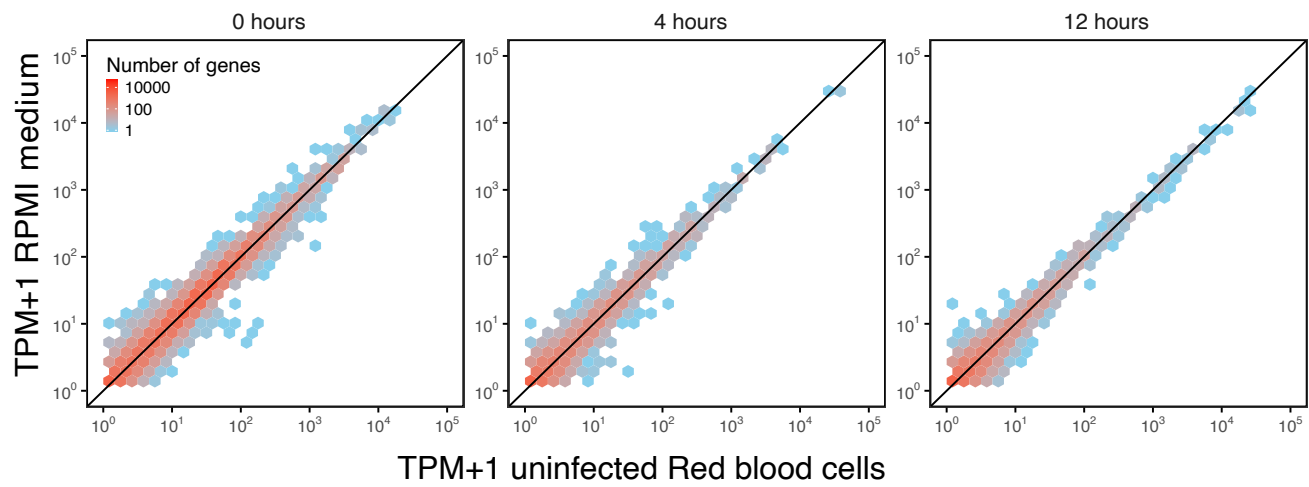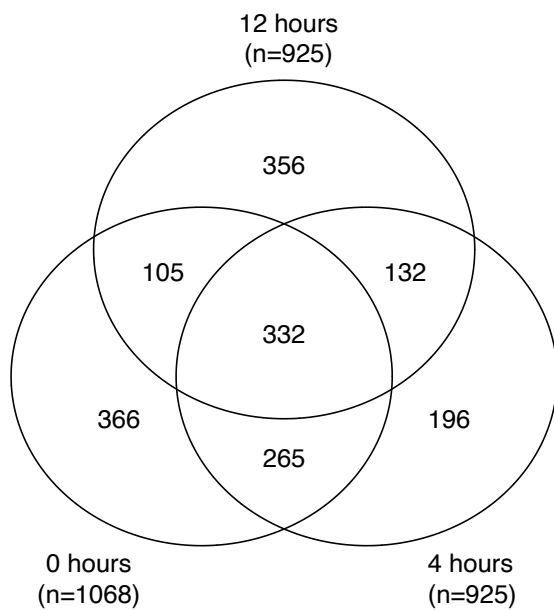

*Supplementary Figure 1: RPMI control is similar to uRBC control and a summary of the differences between iRBC and uRBC. (A) RNA expression of PBMCs recently exposed to RPMI or uninfected RBCs and subsequently stimulated with PAM<sub>3</sub>CSK<sub>4</sub> (after 0, 4, and 12 hours). RNA expression units correspond to Transcripts Per Million (TPM) mapped reads and are the average of three biological replicates. Each hexagonal bin shows the number of genes with the corresponding expression level. (B) Venn diagram showing the number of genes that are differentially expressed over either of the PAM<sub>3</sub>CSK<sub>4</sub> time courses that also have a 3-fold or greater difference between uRBC and iRBC at the same times.*

**A**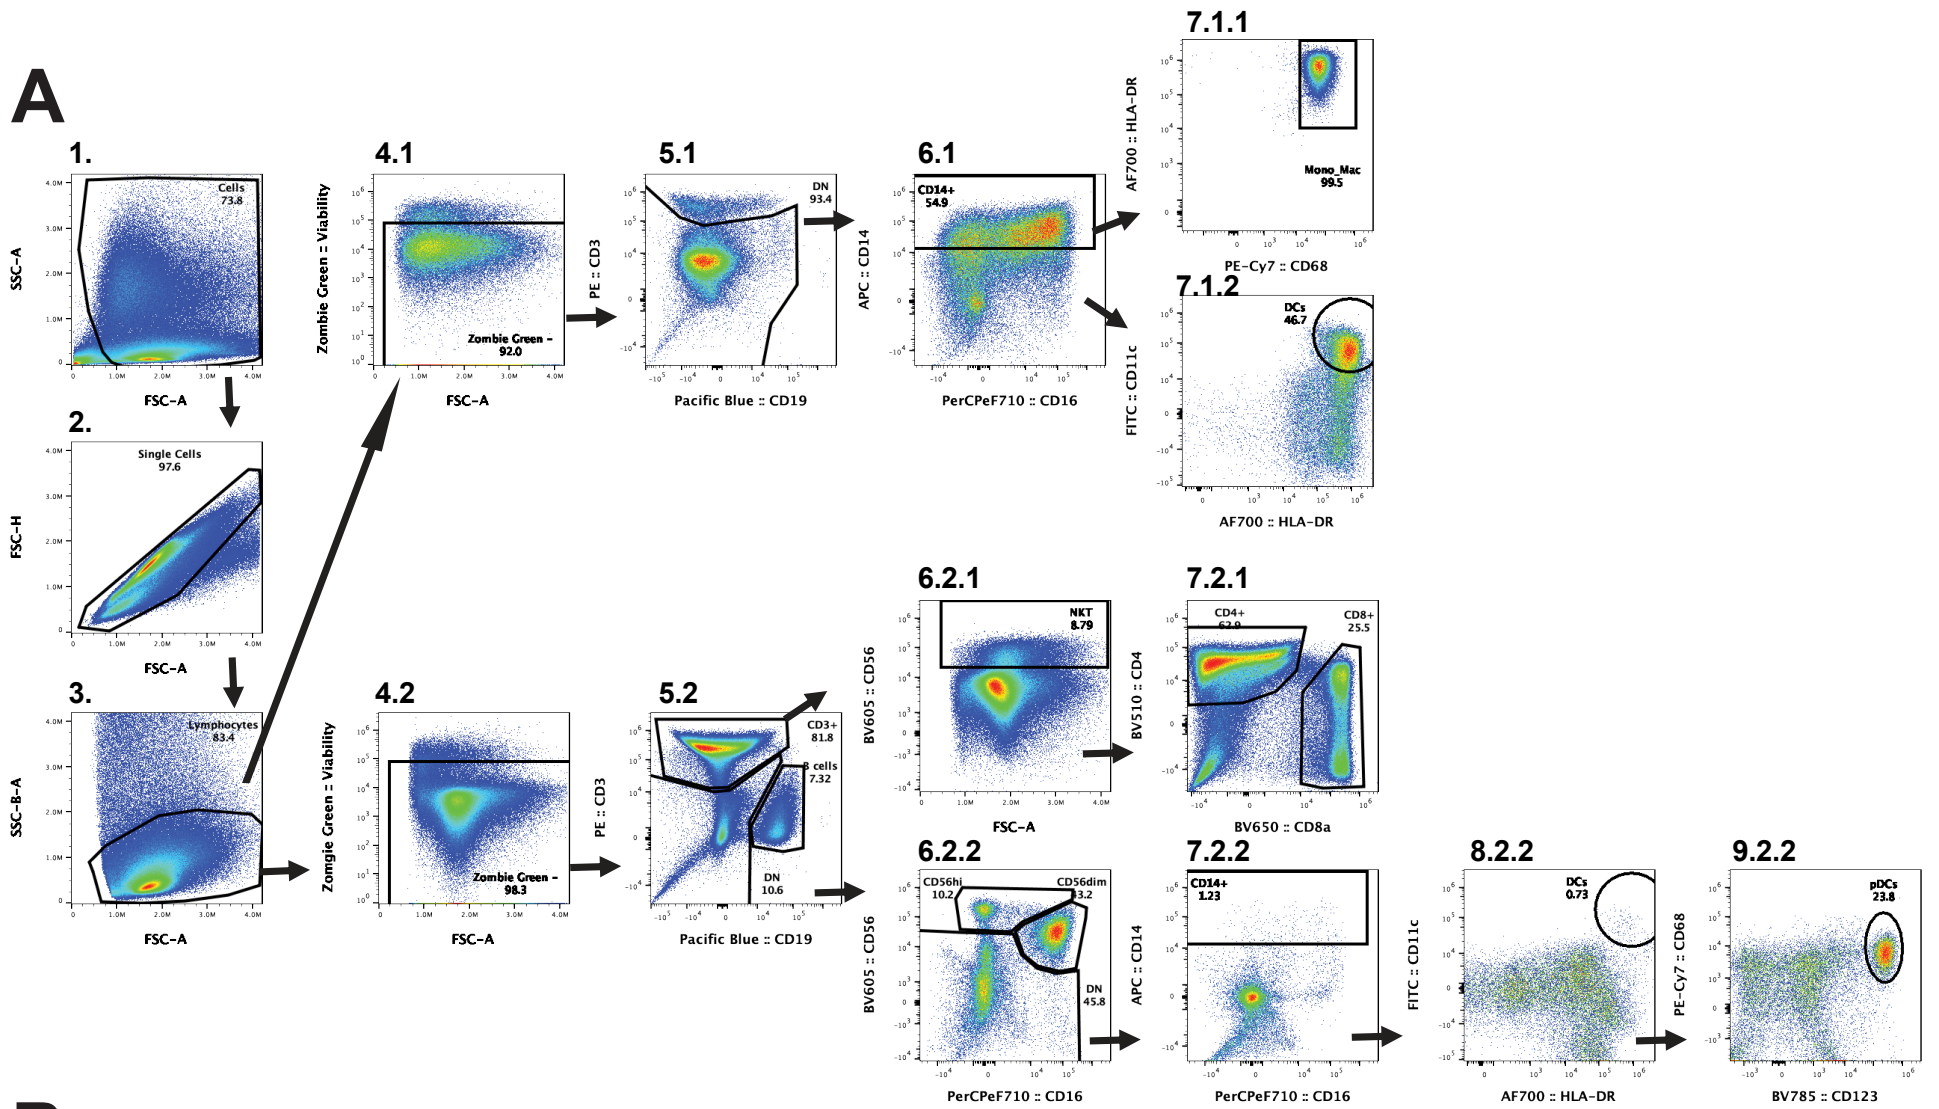**B**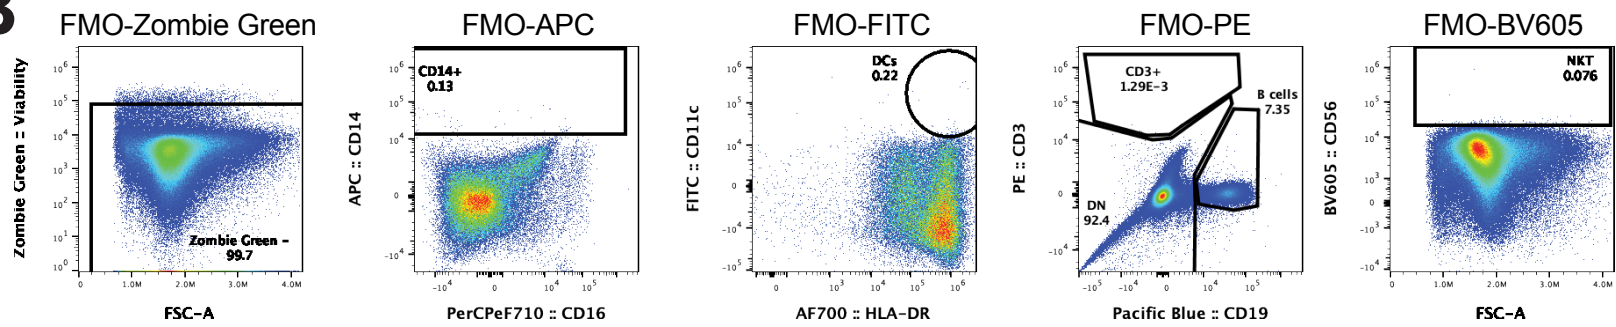**C**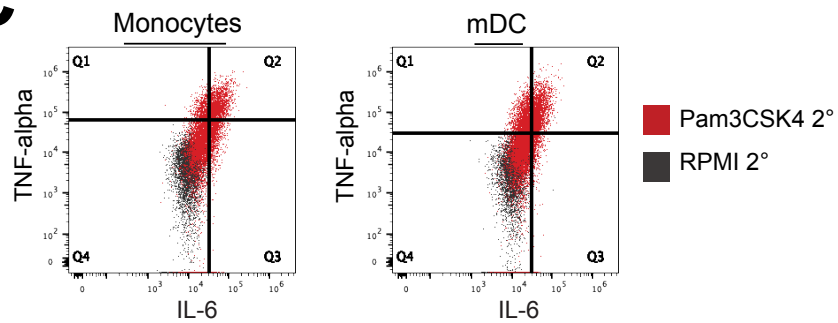

*Supplementary Figure 2: Cytex Aurora Cell Phenotyping Panel*

(A) Gating strategy to determine nine distinct cell types in trained PBMC. (B) Fluorescence-Minus-One (FMO) controls used to determine fluorescent staining thresholds. C) Overlays of indicated cell populations from iRBC-trained PBMC with RPMI as a secondary stimulus (Black) or with Pam3CSK4 as a secondary stimulus (Red).



# A Monocytes

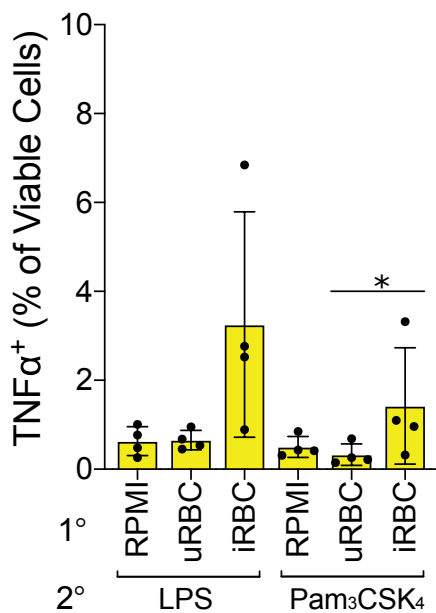

# B Monocytes

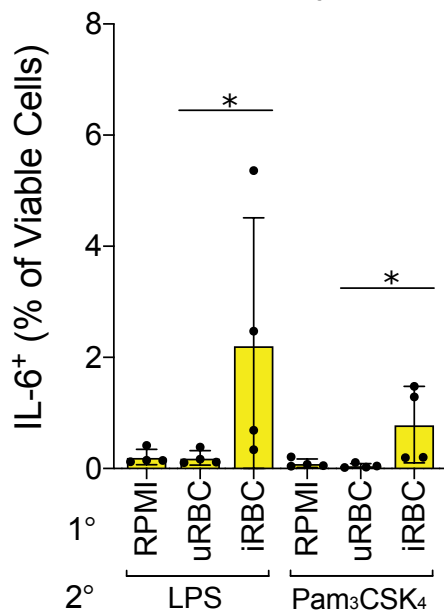

# C mDC

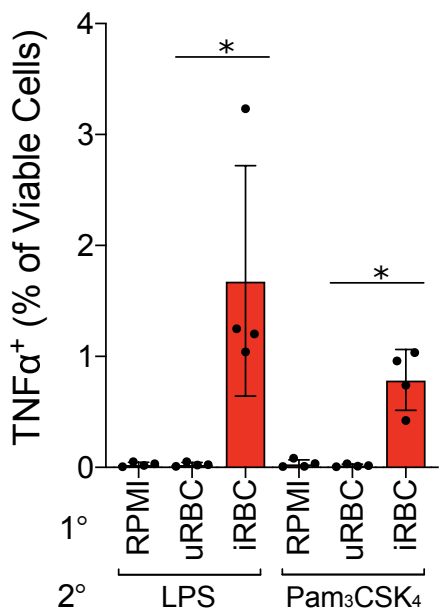

# D mDC

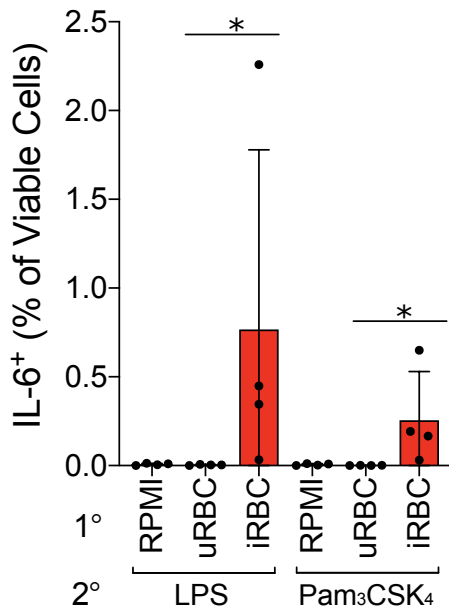

*Supplementary Figure 3: Monocyte and mDC cytokine frequency*

Monocytes and mDCs from trained PBMC restimulated with LPS or Pam<sub>3</sub>CSK<sub>4</sub> for 5 hours. Frequency of total viable cells for monocytes producing TNF $\alpha$  (A) or IL-6 (B).

Frequency of total viable cells for mDC producing TNF $\alpha$  (C) or IL-6 (D). N=4; error bars represent mean  $\pm$  S.D. \*p $\leq$ 0.05.

**A**

# Monocytes

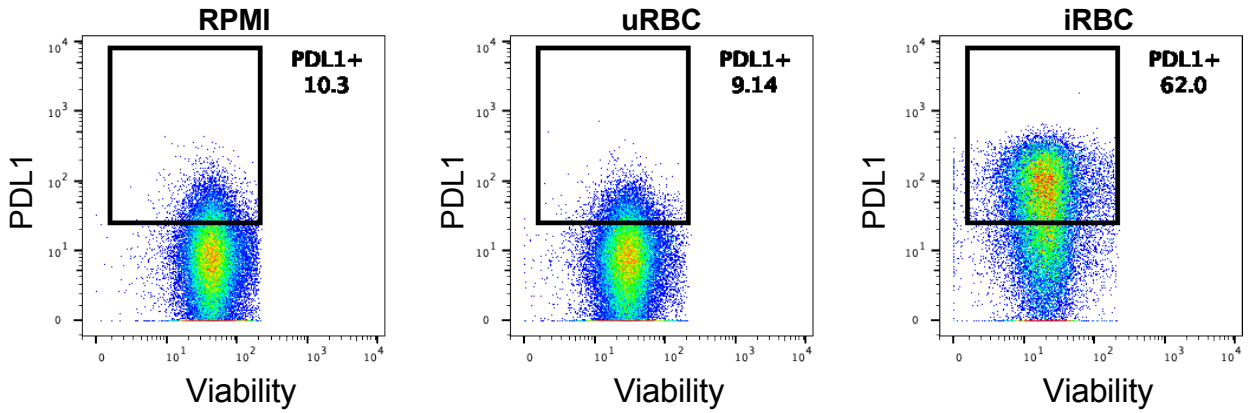

# mDCs

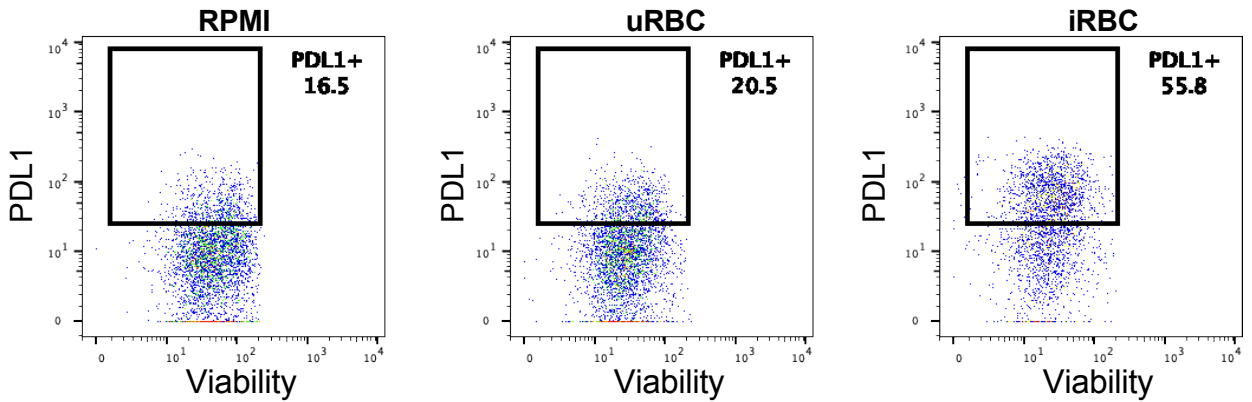**B**

# MMO-PDL1

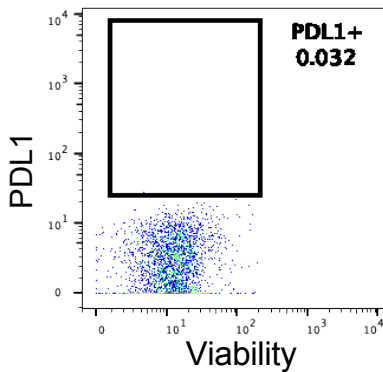**C**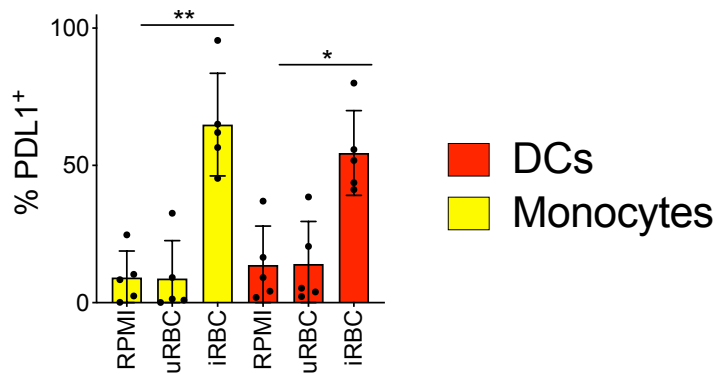

*Supplementary Figure 4: PDL1 is upregulated on Monocytes and mDCs in response to iRBC stimulation*

CyTOF of PBMC stimulated with RPMI, uRBC or iRBC for 12 hours. (A) PDL1 surface expression on monocytes and mDCs from a representative donor. (B) Metal-Minus-One (MMO) of PDL1. (C) Frequency of PDL1 surface expression for monocytes and mDC. N=5; error bars represent mean  $\pm$  S.D. \*  $p \leq 0.05$ , \*\*  $p \leq 0.01$ .

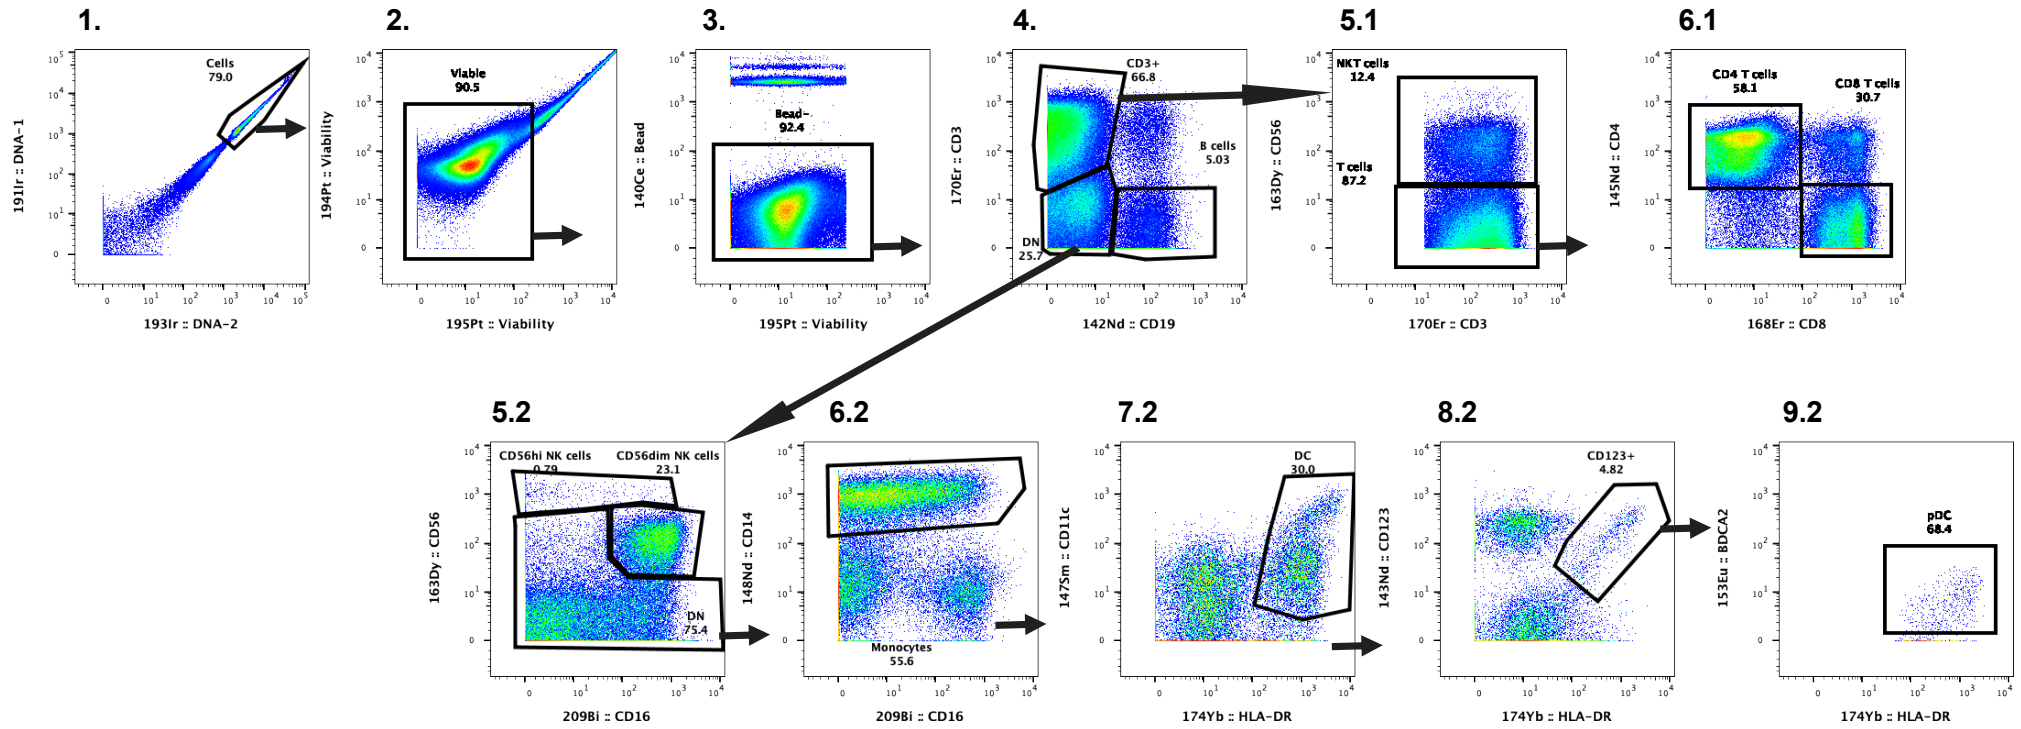

*Supplementary Figure 5: CyTOF cell phenotyping panel*

Gating strategy to determine nine distinct cell types in PBMC stimulated for 12 hours with RPMI, uRBC or iRBC, and measure IFN $\gamma$  production. Arrows indicate populations that are subgated on.

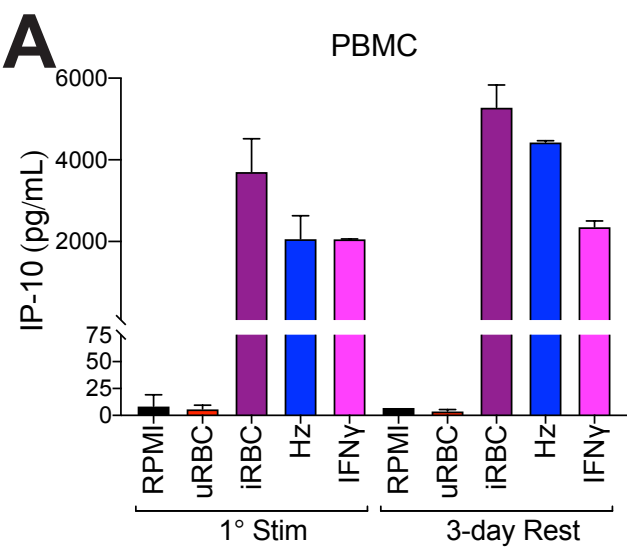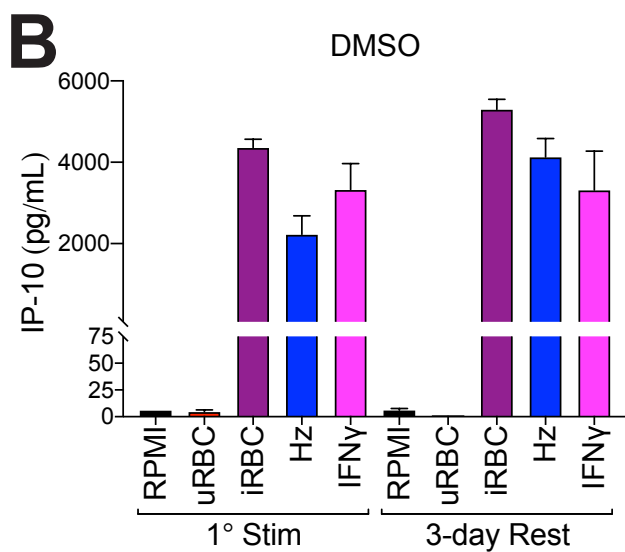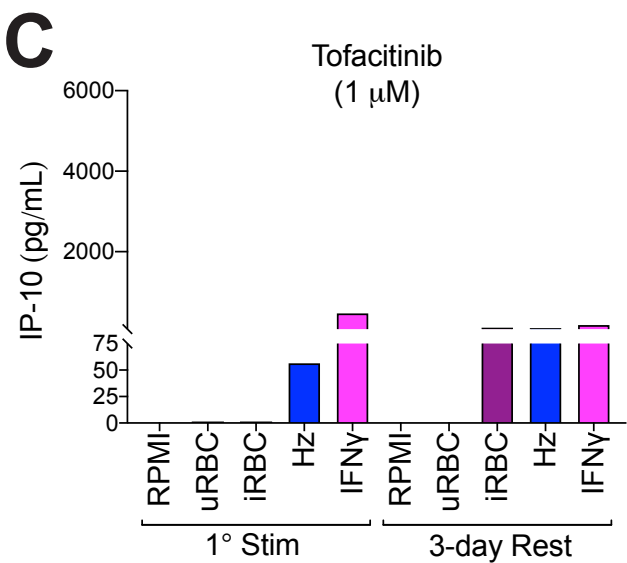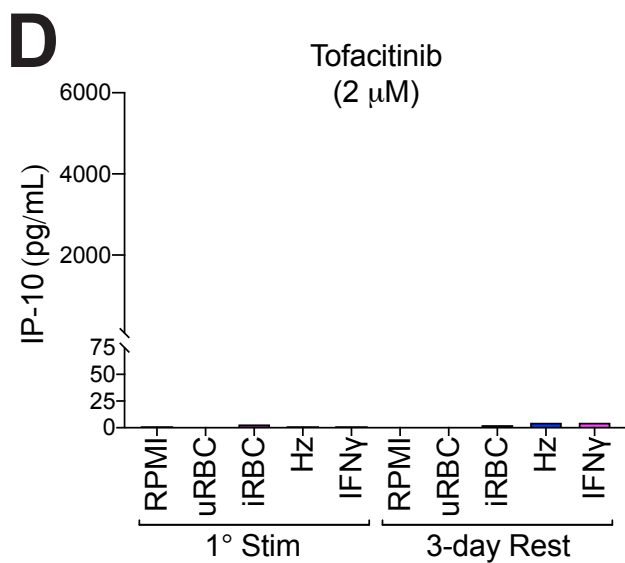

*Supplementary Figure 6: Tofacitinib blocks IFN $\gamma$ R-mediated induction of IP-10/CXCL10*  
(A-D) IP-10 ELISA of supernatants from PBMC during primary training stimulus, and 3-day rest period. (A) PBMC. (B) PBMC treated with DMSO solvent during primary stimulus and 3-day rest. (C) PBMC treated with 1 $\mu$ M Tofacitinib during primary stimulus and 3-day rest. (D) PBMC treated with 2 $\mu$ M Tofacitinib during primary stimulus and 3-day rest.



**A**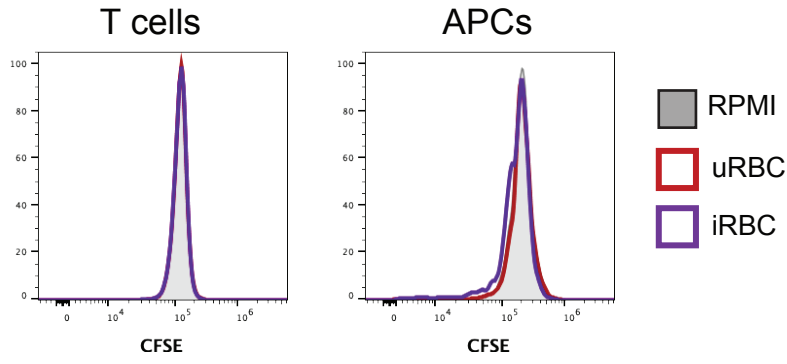**B**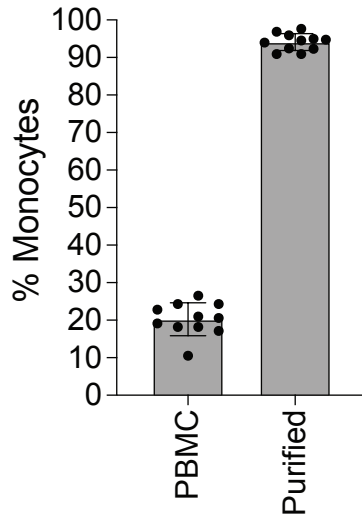**C**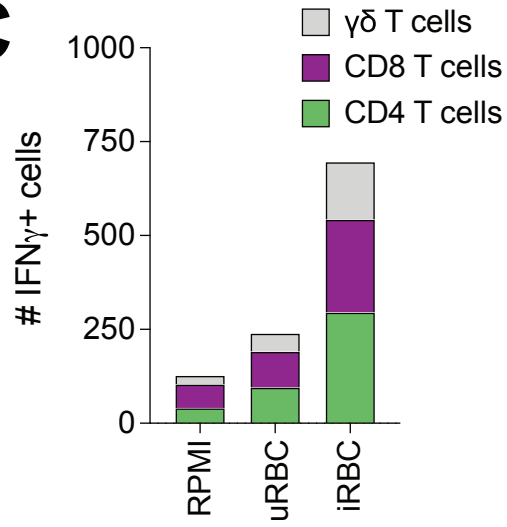**D**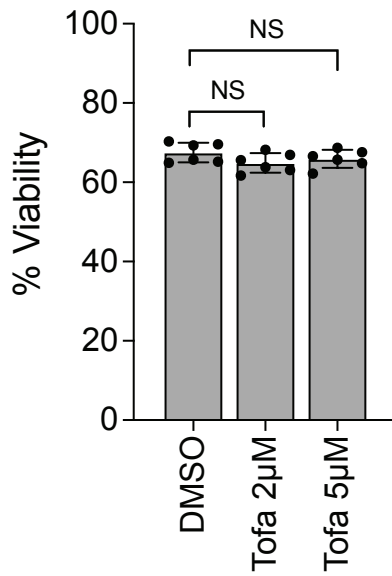

*Supplementary Figure 7:*

(A) PBMC were labeled with CFSE and then trained with RPMI, uRBC or iRBC for 24 hours, and then rested 3 days. Cells were analyzed for proliferation by CFSE in T cells (CD3+) and in antigen-presenting cells (APCs) (HLA-DR+). Experiment is representative of 3 replicates (N=3 donors). (B) PBMC were enriched for monocytes using magnetic assisted cell sorting. The frequency of Monocytes was assessed by flow cytometry in the PBMC and the purified monocytes. N=11 Error bars represent Mean  $\pm$  S.D. (C) PBMC were stimulated for 12 hours and assessed for IFN $\gamma$  production by intracellular cytokine staining in gamma/delta T cells (CD3+gdTCR+), CD8 T cells (CD3+CD8+) and CD4 T cells (CD3+CD4+). N=4. (D) PBMC were treated with DMSO or Tofacitinib at indicated concentrations for 24 hours, and then viability was assessed using a fixable viability dye. N=6 Error bars represent Mean  $\pm$  S.D.
